## PERSPECTIVE

# Is C-reactive protein sufficient to guide antimicrobial therapy for lower respiratory tract infections among children? Results from a stepped-wedge cluster randomized trial in Uganda

Chris A. Rees<sup>1</sup>, Prashant Mahajan<sup>2,3</sup>, Quique Bassat<sup>4,5,6,7,8\*</sup>

**1** Division of Pediatric Emergency Medicine, Emory University School of Medicine, Atlanta, Georgia, United States of America, **2** Department of Pediatrics, University of Michigan, Ann Arbor, Michigan, United States of America, **3** Department of Emergency Medicine, University of Michigan, Ann Arbor, Michigan, United States of America, **4** Centro de Investigação em Saúde de Manhica [CISM], Maputo, Mozambique, **5** ISGlobal—Hospital Clínic, Universitat de Barcelona, Barcelona, Spain, **6** ICREA, Barcelona, Spain, **7** Pediatrics Department, Hospital Sant Joan de Déu, Universitat de Barcelona, Esplugues, Barcelona, Spain, **8** CIBER de Epidemiología y Salud Pública, Instituto de Salud Carlos III, Madrid, Spain

\* [quique.bassat@isglobal.org](mailto:quique.bassat@isglobal.org)

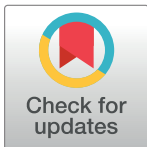

## OPEN ACCESS

**Citation:** Rees CA, Mahajan P, Bassat Q (2024) Is C-reactive protein sufficient to guide antimicrobial therapy for lower respiratory tract infections among children? Results from a stepped-wedge cluster randomized trial in Uganda. *PLoS Med* 21(9): e1004467. <https://doi.org/10.1371/journal.pmed.1004467>

**Published:** September 17, 2024

**Copyright:** © 2024 Rees et al. This is an open access article distributed under the terms of the [Creative Commons Attribution License](https://creativecommons.org/licenses/by/4.0/), which permits unrestricted use, distribution, and reproduction in any medium, provided the original author and source are credited.

**Funding:** The author(s) received no specific funding for this work.

**Competing interests:** CAR co-authored two of the publications cited in this Perspective. CAR was supported by the United States National Institutes of Health (K23HL173694). CAR has served as a research consultant to the World Health Organization, including for guidelines related to the management of lower respiratory tract infections. QB co-authored one of the publications cited in this Perspective. We declare no other conflict of interests.

The accurate identification of young children with non-severe lower respiratory tract infections who may benefit from antimicrobial therapy is crucial both for individual patient management but also to curb growing rates of antimicrobial resistance that pose a public health threat. Research by Ciccone and colleagues suggests that using a C-reactive protein guided approach to the evaluation of young children with lower respiratory tract infections may help reduce antimicrobial prescription without increasing rates of treatment failure.

Despite more than a 75% global reduction in fatal cases of lower respiratory tract infections (LRTI) from the 1990s to the 2020s, LRTIs continue to be the leading individual cause of morbidity and mortality for children aged 2 to 59 months [1]. Despite such significant burden, there is no clinically feasible reference standard for the diagnosis of LRTI. A definitive diagnosis of LRTI can only be made through lung biopsy, which is neither feasible nor necessary in routine clinical practice. Due to the assumption that a high proportion of fatal LRTIs are bacterial in nature, the World Health Organization (WHO) recommends that the diagnosis and treatment of LRTI in low- and middle-income countries be driven by severity and clinical presentation, with more severe cases requiring referral to the hospital. Specifically, the WHO recommends that children aged between 2 and 59 months with a cough and age-adjusted tachypnea be treated with antibiotics either in the community for non-severe cases or in the hospital for severe cases [2]. WHO-defined LRTI does not require radiographic confirmation. However, prior studies have questioned the accuracy of clinical signs and symptoms for WHO-defined LRTI compared to radiographic pneumonia [3].

It should be noted, however, that chest radiographic findings cannot be used to accurately distinguish between viral and bacterial etiologies [4]. To add further complexity, findings from a multi-center study involving extensive etiological testing suggest that as many as 60% of young children with LRTIs had viruses (and not bacterial infections), and thus may not directly benefit from antimicrobial therapy [5]. This may explain why findings from randomized controlled trials suggest that children with non-severe WHO-defined LRTI treated with shorter courses of antimicrobial therapy (i.e., 3 days) [6] and even with placebo [7] had no

difference in rates of treatment failure or symptom relapse compared to children with non-severe WHO-defined LRTI treated with 5 and 3 days of antimicrobial therapy, respectively. Moreover, several studies have demonstrated that the indiscriminate administration of antimicrobial therapy to children can contribute to antimicrobial resistance [8]. Therefore, it is imperative that antimicrobial therapy be tailored to the child with high risk of a bacterial pathogen and potentially avoided if a child has low risk of a bacterial infection. Thus, the crucial question in the management of LRTI in children in low- and middle-income countries is: Which child requires antibiotics and which child can be safely managed expectantly without antibiotics?

The study published by Ciccone and colleagues aims to answer this question [9]. The authors conducted a stepped-wedge cluster randomized trial in 15 villages in Uganda that incorporated the use of point-of-care C-reactive protein (CRP) levels from children aged 2 to 59 months collected by lay community health workers, with the primary outcome of antimicrobial prescription reduction for WHO-defined LRTI. They analyzed data on 1,220 children who met the study's inclusion criteria (i.e., children aged 2 to 59 months evaluated by a community health worker, with fever [ $>38^{\circ}\text{C}$ ] or subjective fever within the past 7 days, and tachypnea [respiratory rate  $>30$  breaths per minute] or cough). Community health workers used a predetermined CRP level of  $\geq 40$  mg/L to determine if a child needed the prescription of a five-day course of oral amoxicillin. For children with a CRP of  $<40$  mg/L, community health workers were instructed to recommend adequate hydration and antipyretics as needed for fever.

The investigators observed a nearly 25% reduction in the prescription of antimicrobial therapy for suspected LRTI among enrolled participants. Importantly, the investigators did not identify differences in their secondary outcomes that described potential negative effects from withholding antimicrobial prescriptions. The authors concluded that the incorporation of CRP into the routine management of LRTI among young children has the potential to reduce antimicrobial therapy administration with no difference in clinical outcomes.

This well-designed trial has many strengths. The investigators used a pragmatic design and trained community health workers, who are often front-line providers for young children with LRTI in low- and middle-income countries. The authors note that the number needed to test to avoid one course of amoxicillin was four. This is noteworthy as the number needed to treat for common medications such as acetaminophen for fever is as high as seven [10]. Furthermore, although a formal cost benefit analysis was not conducted, the authors note that the associated cost of testing 4 individuals to reduce one course of antibiotics would be roughly \$6.80 USD. Of course, this is much higher than the reported cost of one course of amoxicillin (i.e., \$0.50 to \$1.30), but the larger public health benefits from improved antimicrobial stewardship are difficult to measure.

Despite these strengths, there are additional areas of opportunity that this study presents. The authors chose a CRP level of  $\geq 40$  mg/L to guide the community health worker's decision to provide antimicrobial therapy or not. The authors report that the rationale for this decision was based on prior studies that suggest that withholding antimicrobial therapy in children with a CRP of  $<40$  mg/L was safe, and that level also had high negative predictive value for radiographic pneumonia. Ideally, biomarker levels used for clinical decision-making should be empirically derived against the outcome of interest. Thus, further studies are needed to elucidate a CRP level at which antimicrobial therapy can be withheld without negative outcomes for children with LRTI. Next, children enrolled in this study had suspected LRTI, which is diagnosed clinically per current WHO recommendations with no need for blood draws. If CRP were to be integrated into routine practice, the potential inconveniences to children who would otherwise not have a blood draw and for the health care providers responsible for the

blood draws needs to be considered. Another area for opportunity in future investigations is the inclusion of pulse oximetry. Prior studies have demonstrated that hypoxia has been associated with poor outcomes in children with LRTI [11]. However, nearly 80% of participants had missing data on pulse oximetry in this study. Future studies may consider the inclusion of both pulse oximetry and diagnostic, but also prognostic, biomarkers to more accurately identify young children with suspected LRTI at risk of severe outcomes [12], and/or in need of antimicrobial therapy and referral to hospital settings. Furthermore, additional studies are ongoing to assess the ability of point-of-care lung ultrasound to accurately identify young children with WHO-defined LRTI without abnormal findings who may not benefit from antimicrobial therapy. Lastly, it is important to note that this study was limited to children with mild LRTI. Withholding antimicrobial therapy from a child with suspected LRTI in severe respiratory distress, regardless of their CRP level, is unwise without further risk stratification and guidance.

The incorporation of CRP into the approach community health workers take to prescribe amoxicillin to young children with suspected LRTI is a step toward safe and improved antimicrobial stewardship. However, just as WHO guidelines have balanced feasibility and generalizability for LRTI management, similar considerations will be required before CRP can be integrated into routine clinical practice.

## References

1. Global, regional, and national incidence and mortality burden of non-COVID-19 lower respiratory infections and aetiologies, 1990–2021: a systematic analysis from the Global Burden of Disease Study 2021. *Lancet Infect Dis*. 2024; 24(9):974–1002. Epub 20240415. [https://doi.org/10.1016/S1473-3099\(24\)00176-2](https://doi.org/10.1016/S1473-3099(24)00176-2) PMID: 38636536; PubMed Central PMCID: PMC11339187.
2. World Health Organization. Integrated Management of Childhood Illnesses (IMCI) chart booklet. 2014. p. 80.
3. Rees CA, Basnet S, Gentile A, Gessner BD, Kartasasmita CB, Lucero M, et al. An analysis of clinical predictive values for radiographic pneumonia in children. *BMJ Glob Health*. 2020; 5(8). <https://doi.org/10.1136/bmjgh-2020-002708> PMID: 32792409; PubMed Central PMCID: PMC7430338.
4. Swingler GH. Radiologic differentiation between bacterial and viral lower respiratory infection in children: a systematic literature review. *Clin Pediatr (Phila)*. 2000; 39 (11):627–633. <https://doi.org/10.1177/000992280003901101> PMID: 11110362.
5. Causes of severe pneumonia requiring hospital admission in children without HIV infection from Africa and Asia: the PERCH multi-country case-control study. *Lancet*. 2019; 394(10200):757–79. Epub 20190627. [https://doi.org/10.1016/S0140-6736\(19\)30721-4](https://doi.org/10.1016/S0140-6736(19)30721-4) PMID: 31257127; PubMed Central PMCID: PMC6727070.
6. Ginsburg AS, Mvalo T, Nkwopara E, McCollum ED, Phiri M, Schmicker R, et al. Amoxicillin for 3 or 5 Days for Chest-Indrawing Pneumonia in Malawian Children. *N Engl J Med*. 2020; 383(1):13–23. <https://doi.org/10.1056/NEJMoa1912400> PMID: 32609979; PubMed Central PMCID: PMC7233470.
7. Ginsburg AS, Mvalo T, Nkwopara E, McCollum ED, Ndamala CB, Schmicker R, et al. Placebo vs Amoxicillin for Nonsevere Fast-Breathing Pneumonia in Malawian Children Aged 2 to 59 Months: A Double-blind, Randomized Clinical Noninferiority Trial. *JAMA Pediatr*. 2019; 173 (1):21–28. <https://doi.org/10.1001/jamapediatrics.2018.3407> PMID: 30419120; PubMed Central PMCID: PMC6583426.
8. Arzika AM, Abdou A, Maliki R, Beido N, Kadri B, Harouna AN, et al. Prolonged mass azithromycin distributions and macrolide resistance determinants among preschool children in Niger: A sub-study of a cluster-randomized trial (MORDOR). *PLoS Med*. 2024; 21(5):e1004386. Epub 20240506. <https://doi.org/10.1371/journal.pmed.1004386> PMID: 38709718; PubMed Central PMCID: PMC11073710.
9. Ciccone EJ, Hu D, Preisser JS, Cassidy CA, Kabugho L, Emmanuel B, et al. Point-of-care C-reactive protein measurement by community health workers safely reduces antimicrobial use among children with respiratory illness in rural Uganda: A stepped wedge cluster randomized trial. *PLoS Med*. 2024; 21(8):e1004416. <https://doi.org/10.1371/journal.pmed.1004416> PMID: 39159269
10. de Sévaux JLH, Damoiseaux RA, van de Pol AC, Lutje V, Hay AD, Little P, et al. Paracetamol (acetaminophen) or non-steroidal anti-inflammatory drugs, alone or combined, for pain relief in acute otitis media in children. *Cochrane Database Syst Rev*. 2023; 8(8):Cd011534. Epub 20230818. <https://doi.org/10.1002/14651858.CD011534.pub3> PMID: 37594020; PubMed Central PMCID: PMC10436353.

11. Rees CA, Colbourn T, Hooli S, King C, Lufesi N, McCollum ED, et al. Derivation and validation of a novel risk assessment tool to identify children aged 2–59 months at risk of hospitalised pneumonia-related mortality in 20 countries. *BMJ Glob Health*. 2022; 7(4). <https://doi.org/10.1136/bmjgh-2021-008143> PMID: 35428680; PubMed Central PMCID: PMC9014031.
12. Balanza N, Erice C, Ngai M, McDonald CR, Weckman AM, Wright J, et al. Prognostic accuracy of biomarkers of immune and endothelial activation in Mozambican children hospitalized with pneumonia. *PLoS Glob Public Health*. 2023; 3(2):e0001553. Epub 20230223. <https://doi.org/10.1371/journal.pgph.0001553> PMID: 36963048; PubMed Central PMCID: PMC10021812.
